# Supplementary material for: Hydroboration of metal–carbon triple bonds †
Source: Royal Society of Chemistry journal article supplement (doi:10.1039/b004256k), 2000-01-01
Supplement: b004256k.doc [file b004256k.doc]

**Supplementary Information**

**Infrared spectra[[1]](#footnote-2)**

**[(η-C5Me5)(CO)2MoCC6H4Me-4] 9** (in thf): 1982 (s), 1906 (s) cm-1; (*n*-hexane): 1988 (s), 1916 (s) cm- 1.

**[(η -C5Me4Et)(CO)2W{ η 3-C(H)(BEt2)C6H4Me-4}] 4c** (in pentane): 1932 (s), 1846 (s) cm-1.

**[(η -C5Me5)(CO)2Mo{ η 3-C(H)(BEt2)C6H4Me-4}] 10** (in thf): 1931 (s), 1841 (s) cm-1.

**[(η-C5Me4Et)(CO){C(O)Et}W{1-4-η-[(2-CH3)(5-CH2){6-(1'-bora-2',6'-dioxa-1'-Et-3',5',5'-Me3- cyclohex-3'-yl)}-cyclohexadiene]}] 14** (in thf): 1910 (s), 1611 (m) cm-1.

**[(η -C5Me5)(CO)2W(C2D3-*n*H2+*n*)] 11b-D** (in thf): 1956 (s), 1876 (s) cm-1.

**Complexes of the type [tpb'(CO)2M{ η 2-B(R)CH2R'}]:**

**8** (in toluene): 1908 (s), 1830 (vs) cm-1.

**7a** (in toluene): 1896 (s), 1817 (vs) cm-1.

**7b** (in toluene): 1893 (s), 1814 (vs) cm-1.

**7b-D** (in toluene): 1894 (s), 1815 (vs) cm-1.

**7c-D** (in toluene): 1896 (s), 1818 (vs) cm-1.

**16a** (in toluene): 1905 (s), 1826 (vs) cm-1.

**16b** (in toluene): 1902 (s), 1823 (vs) cm-1.

**Preparation of [(η -C5Me5)(CO)2MoCC6H4Me-4] 9**2

Method 1: A solution of 10 mmol of LiC6H4Me-4 in 60 ml of diethlether (prepared from 1.71 g (10 mmol) of BrC6H4Me-4 and 12 ml (20 mmol) of an 1.7 M solution of *t*BuLi in pentane) is added dropwise to a slurry of 2.64 g (10.0 mmol) of [Mo(CO)6] in 250 ml of ether. The yellow-orange solution is cooled to -80°C and 2.52 g (12.0 mmol) of (CF3CO)2O in 20 ml of ether is added dropwise. The solution is slowly warmed to -40°C, when the colour changes from red to yellow. A 2.11 g (15.5 mmol) sample of (C5Me5)K (prepared from 2.11 g (15.5 mmol) of C5Me5H and 0.62 g (15.5 mmol) of KH in thf) is added. The slurry is slowly warmed to room temperature. Solvent is removed from the red mixture under reduced pressure, and the residue chromatographed on alumina using *n*-hexane/CH2Cl2 (4:1) as the mobile phase. The volume of the first orange-red fraction is reduced under vacuum and stored at -20°C to give 1.1 g (28%) of **9** as dark red crystals.

Method 2: A cold (-15°C) suspension of 6.8 g (18.4 mmol) of [(CO)5Mo{C(OMe)C6H4Me-4}] in 150 ml of pentane is treated with 7.3 g (29.1 mmol) of BBr3. The slurry is stirred at -20°C for 1.5 h and then cooled to -80°C. Solvent is removed with a syringe and the residue suspended in cold (-40°C) thf (150 ml). A thf solution of (C5Me5)K (prepared from 3.1 g (22.7 mmol) of C5Me5H and 0.91 g (22.7 mmol) of KH) is added at -20°C. The mixture turn red immediately. After stirring at -20°C for 30 min the mixture is warmed to room temperature. Solvent is removed under vacuum, and the residue is chromatographed on alumina using *n*-hexane/CH2Cl2 (4:1) as the mobile phase. The first orange red fraction is chromatographed again on alumina at -20°C using pentane as the mobile phase. Solvent is removed from the orange fraction to give 1.54 g (21%) of **9** as red microcrystals.

1H NMR (C6D6) *d* 1.88 (s, 3H, Me-4), 1.90 (s, 15H, C5Me5), 6.71 (m, 2H, C6H4), 7.35 (m, 2H, C6H4). - 13C{1H} NMR (C6D6): *d* 11.3 (C5*Me*5), 21.5 (Me-4), 106.1 (*C*5Me5), 128.9 (CH), 129.2 (CH), 138.9 (C), 145.2 (C), 233.4 (CO). - MS (EI, 70 eV): m/*z* (rel. int., %) 492 (11, *M*+), 364 (7, [*M*-CO]+), 336 (52, [*M*- 2CO]+), 301 (73, [*M*-C6H4Me]+).

**Alternative preparation of [tpb'(CO)2WCMe] 5b [[2]](#footnote-3)**

A 15.2 g (39.8 mmol) sample of [(CO)5W{=C(OMe)Me}] is suspended in 240 ml of pentane at -20°C. With vigorous stirring 10g (39.9 mmol) of BBr3 are added dropwise. The yellow colour of the carbene metal complex disappears gradually and a pale yellow solid precipitates. The slurry is cooled to -80°C, solvent is removed with a syringe and the remaining solid is dried under vacuum. Cold (-10°C) thf (300 ml) is added and the resulting solution treated with Ktpb' (15 g, 44.6 mmol). The mixture is allowed to warm slowly to room temperature and the course of the reaction is monitored by IR spectroscopy. As soon as the nCO bands of [Br(CO)4WCMe] are no longer visible solvent is removed under vacuum. The residue is chromatographed twice on silica with hexane/toluene (1:1) as the mobile phase. Solvent is removed from the eluate to give 18.1 g (81 %) of [tpb'(CO)2WCMe] **5b** as a yellow solid.

**Preparation of [tpb'(CO)2W{ η 2-B(Et)CD2Me}] 7b-D**

Following the above procedure, 1.82 g (89%) of [tpb'(CO)2W{B(Et)CD2Me}] **7b-D** was obtained from 1.93 g (3.40 mmol) of [tpb'(CO)2WCMe] **2** and 0.76 g (5.4 mmol) of (DBEt2)2.

MS (EI, 70 eV): m/*z* (rel. int., %) 608 (46, *M*+).

Anal. calcd for C21H30D2N6B2O2W (*M*r = 608.01): C, 41.48; H+D, 5.64; N, 13.82. Found: C, 41.61; H+D, 5.42; N, 13.79.

**Preparation of [tpb'(CO)2W{ η 2-B(Et)CH2C6H4Me-4}] 7a**

A 310 mg (2.22 mmol) sample of (HBEt2)2 is added dropwise to a toluene solution (20 ml) of 530 mg (0.83 mmol) of [tpb'(CO)2WCC6H5Me-4] **5a** at ambient temperature. After heating of the mixture to 60°C for 15 min the volume is reduced to approx. 5 ml under vacuum and stored at -20°C. A fine crystalline yellow precipitate is collected, redissolved in a minimum amount of toluene and chromatographed on silica at -45°C using toluene as the mobile phase. Solvent is removed from the yellow eluate, the pale yellow residue washed several times with pentane and dried under vacuum to yield 380 mg (67 %) of [tpb'(CO)2W{B(Et)CH2C6H4Me-4}] **7a** as pale yellow crystals.

MS (EI, 70 eV): m/z (rel. int., %) 682 (14, *M*+), 654 (6, [*M*-CO]+), 626 (6, [*M*-2CO]+). - Anal. calcd for C27H36N6B2O2W (*M*r = 682.09): C, 47.54; H, 5.32; N, 12.32. Found: C, 47.50; H, 5.47; N, 12.17.

**Preparation of [tpb'(CO)2W{ η 2-B(Et)CD2C6H5}] 7c-D**

A 398 mg (2.82 mmol) sample of (DBEt2)2 is added dropwise to a toluene solution (50 ml) of [tpb'(CO)2WCC6H5] **5c** at ambient temperature. The solution is heated to 60°C for 2 h. After cooling to room temperature solvent is removed under vacuum. The pale yellow residue is repeatedly washed with hexane and dried under vacuum to give 556 mg (69%) of pale yellow [tpb'(CO)2W{B(Et)CD2C6H5}] **7c- D**.

MS (EI, 70 eV): m/*z* (rel. int., %) 670 (80, *M*+), 642 (12, [*M*-CO]+).

**Preparation of [tpb'(CO)2W{ η 2-B(Ph)CH2C6H4Me-4}] 16a**

A solution of 1.98 g (3.09 mmol) of [tpb'(CO)2WCC6H4Me-4] **5a** and 350 mg (1.94 mmol) of (H2BPh)2 in 40 ml of toluene is stirred at ambient temperature for 1 hour. The colour of the solution changes from orange to yellow. Solvent is removed under vacuum. The residue is washed with four 50 ml portions of hexane/toluene (10:1) and then with two 20 ml portions of pentane. The resulting yellow powder is dried under vacuum to give 1.88 g (83 %) of [tpb'(CO)2WB(Ph)CH2C6H4Me-4] **16a**.

MS (EI, 70 eV): m/*z* (rel. int., %) 730 (100, *M*+), 702 (63, [*M*-CO]+), 674 (65, [*M*-2CO]+). - Anal. calcd for C31H36N6B2O2W (*M*r = 730.14): C, 51.00; H, 4.97; N, 11.51. Found: C, 52.31; H, 5.66; N, 10.87.

1. nCO measured in CaF2 cells with a Bruker IFS-28 Fourier transform spectrometer (optical resolution 0.5 cm-1). [↑](#footnote-ref-2)
2. B. E. Woodworth, D. S. Frohnapfel, P. S. White, J. L. Templeton, *Organometallics* **1998**, *17*, 1655. [↑](#footnote-ref-3)
